# Supplementary material for: Knockdown of hsa_circ_0005699 attenuates inflammation and apoptosis induced by ox-LDL in human umbilical vein endothelial cells through regulation of the miR-450b-5p/NFKB1 axis
Source: PubMed Central journal article supplement — Mol Med Rep. 2022 Jul 28;26(3):290. doi: 10.3892/mmr.2022.12806 (PMC9366159; doi:10.3892/mmr.2022.12806), 2022-07-28

Figure S1. Transfection efficiency of miR-450b-5p mimics, miR-450b-5p inhibitor and NFKB1 overexpression plasmid. (A) Expression levels of miR-450b-5p in HUVECs transfected with miR-NC or miR-450b-5p mimics. \*\*P<0.01 vs. miR-NC. (B) Expression levels of miR-450b-5p in HUVECs transfected with Inh-NC or miR-450b-5p inhibitor. \*\*P<0.01 vs. Inh-NC. (C) Expression levels of NFKB1 expression in HUVECs transfected with empty vector or NFKB1 overexpression plasmid. \*\*P<0.01 vs. empty vector. HUVEC, human umbilical vein endothelial cell; miR, microRNA; NC, negative control; inh, inhibitor.

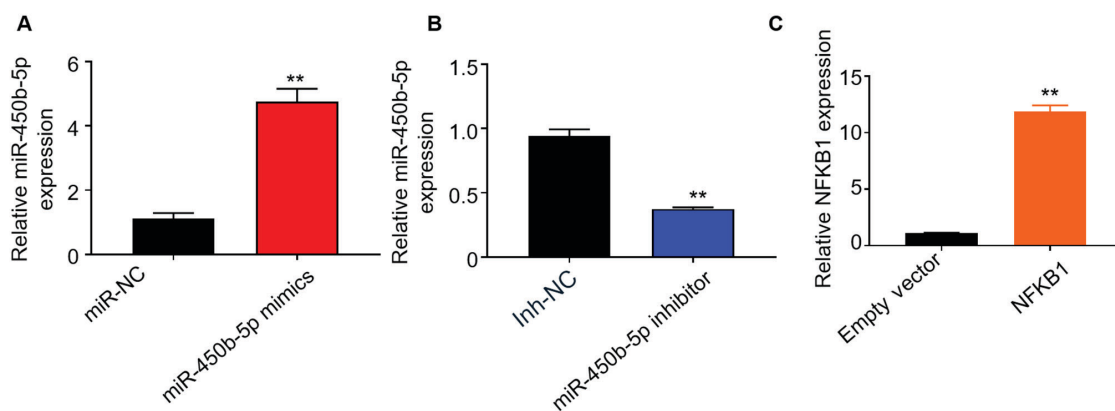

Supplement: Supplementary_Data.pdf [file Supplementary_Data.pdf]
